# Supplementary material for: A Method for Liquid Spectrophotometric Measurement of VariousForms of Iron and Copper in Ambient Aerosols
Source: Copernicus journal article supplement (doi:10.5194/amt-2021-72), 2021-03-09
Supplement: Supplementary file [file amt-2021-72-AC3-supplement.pdf]

**Editor**

***General comments:***

*In the conclusion, detection limits of Fe and Cu in the air are provided. I think the detection limits in air depends on the volume of air sampled. Should the authors also provide detection limits in the solutions?*

**Response:** We thank the editor for the comment. We have added the following text for clarity “**The detection limits in the solutions were 2.07 ppb for WS Fe, 2.05 ppb for WS Cu, 7.00 ppb for total Fe and 3.06 ppb for total Cu.**” to p.8, 1 221-222.
